# Supplementary material for: Polyploidy Improves Photosynthesis Regulation within the Ranunculus auricomus Complex (Ranunculaceae)
Source: MDPI journal article supplement (doi:10.3390/biology10080811), 2021-08-21
Supplement: s1 [file s1]

**Table S1.** Sample and clone codes of plant accessions that were used in the various photosynthesis fluorescence experiments

| Sample            | Plant ID       | $\phi_{PSII}$ | LC | KC | OJIP | Sample               | Plant ID       | $\phi_{PSII}$ | LC | KC | OJIP |
|-------------------|----------------|---------------|----|----|------|----------------------|----------------|---------------|----|----|------|
| <b>2x, 10.0 h</b> |                |               |    |    |      | S4-16                | LH1406030B5-05 | x             |    |    | x    |
| C2-12             | J10xJ30/03     | x             |    |    |      | S4-2                 | LH1406030B1-04 | x             |    | x  |      |
| C2-13             | J10xJ30/11     | x             | x  | x  | x    | S4-20                | LH1406030B5-13 | x             |    |    | x    |
| C2-15             | J20xJ2/16      | x             | x  | x  | x    | S4-21                | LH1406030B5-18 | x             | x  | x  |      |
| C2-19             | J24xJ22/12     | x             | x  | x  | x    | S4-22                | LH1406030B5-20 | x             |    |    |      |
| C2-21             | F3xJ6/25       | x             | x  | x  | x    | S4-23                | LH1406030B4-10 | x             | x  | x  | x    |
| C2-24             | J10xJ14/18     | x             |    | x  | x    | S4-24                | LH1406030G1-8  | x             |    |    | x    |
| C2-25             | J6xF3/19       |               | x  | x  | x    | S4-25                | LH1406030G1-16 |               | x  | x  | x    |
| C2-26             | J10xJ30/05     | x             | x  |    |      | S4-26                | LH1406030G1-18 |               | x  | x  |      |
| C2-27             | J6xF3/14       |               | x  | x  | x    | S4-27                | LH1406030B5-04 | x             |    |    |      |
| C2-4              | F3xJ6/28       | x             |    |    |      | S4-4                 | LH1406030B2-01 | x             |    |    | x    |
| C2-7              | J6xF3/14       | x             | x  | x  | x    | S4-5                 | LH1406030B2-07 | x             | x  | x  |      |
| C2-8              | J6xF7/12       | x             | x  | x  | x    | S4-6                 | LH1406030B4-01 |               | x  | x  | x    |
| C2-9              | J6xF7/14       | x             | x  | x  | x    | S4-8                 | LH1406030B4-11 | x             | x  | x  |      |
| <b>2x, 16.5 h</b> |                |               |    |    |      | <b>6x_29, 10.0 h</b> |                |               |    |    |      |
| S2-1              | F3xJ6/01       | x             | x  | x  | x    | C6-1                 | 29/15-3N/02    | x             | x  |    |      |
| S2-18             | J24xJ22/03     | x             | x  | x  | x    | C6-12                | 29/15-5K/21    | x             | x  | x  | x    |
| S2-2              | F3xJ6/04       | x             | x  | x  | x    | C6-5                 | 29/15-5K/02    | x             | x  | x  | x    |
| S2-21             | F3xJ6/19       | x             | x  | x  | x    | C6-6                 | 29/15-5K/05    | x             | x  | x  | x    |
| S2-23             | F10xJ3/03      | x             | x  | x  | x    | C6-7                 | 29/15-5K/09    | x             | x  | x  | x    |
| S2-24             | J6xF3/06       | x             | x  | x  | x    | <b>6x_29, 16.5 h</b> |                |               |    |    |      |
| S2-25             | J10xJ14/09     | x             |    |    |      | S6-39                | 29/15-5K/20    | x             | x  | x  | x    |
| S2-27             | J24xJ22/09     | x             |    |    |      | S6-9                 | 29/15-5K/06    | x             | x  | x  | x    |
| S2-3              | F3xJ6/05       | x             | x  | x  | x    | S6-1                 | 29/15-5K/03    | x             | x  | x  | x    |
| S2-6              | J6xF3/02       | x             | x  | x  | x    | <b>6x_35, 10.0 h</b> |                |               |    |    |      |
| S2-7              | J6xF3/05       | x             | x  | x  | x    | C6-15                | 35/28-4*/26    | x             | x  | x  | x    |
| S2-9              | J6xF7/08       | x             | x  | x  | x    | C6-16                | 35/28-4*/28    | x             | x  | x  | x    |
| <b>4x, 10.0 h</b> |                |               |    |    |      | C6-22                | 35/28-4a/16    | x             |    |    | x    |
| C4-11             | LH1406030B4-08 | x             | x  | x  | x    | C6-23                | 35/28-4*/27    |               | x  | x  | x    |
| C4-13             | LH1406030B4-16 | x             | x  | x  | x    | C6-25                | 35/28-4a/22    | x             | x  | x  | x    |
| C4-15             | LH1406030B4-18 | x             | x  | x  | x    | C6-33                | 35/28-4Q/82    | x             | x  |    | x    |
| C4-19             | LH1406030B5-07 | x             | x  | x  | x    | <b>6x_35, 16.5 h</b> |                |               |    |    |      |
| C4-21             | LH1406030B5-16 | x             | x  | x  | x    | S6-17                | 35/28-4*/03    | x             | x  | x  | x    |
| C4-22             | LH1406030B5-17 | x             | x  | x  | x    | S6-19                | 35/28-4*/18    | x             | x  | x  | x    |
| C4-23             | LH1406030B5-19 | x             | x  | x  | x    | S6-21                | 35/28-4*/24    |               | x  | x  | x    |
| C4-26             | LH4B005        | x             |    |    |      | S6-22                | 35/28-4*/22    |               |    | x  |      |
| C4-5              | LH1406030B2-04 | x             | x  | x  | x    | S6-24                | 35/28-4*/26    |               | x  | x  | x    |
| C4-8              | LH1406030B4-02 | x             | x  | x  | x    | S6-25                | 35/28-4*/40    |               | x  | x  | x    |
| C4-9              | LH1406030B4-05 | x             | x  | x  | x    | S6-29                | 35/28-4Q/27    | x             |    | x  |      |
| <b>4x, 16.5 h</b> |                |               |    |    |      | S6-33                | 35/28-4Q/28    | x             |    | x  |      |
| S4-11             | LH1406030B4-19 | x             | x  | x  | x    | S6-37                | 35/28-4a/40    |               |    | x  | x    |
| S4-14             | LH1406030B2-02 | x             | x  | x  | x    |                      |                |               |    |    |      |

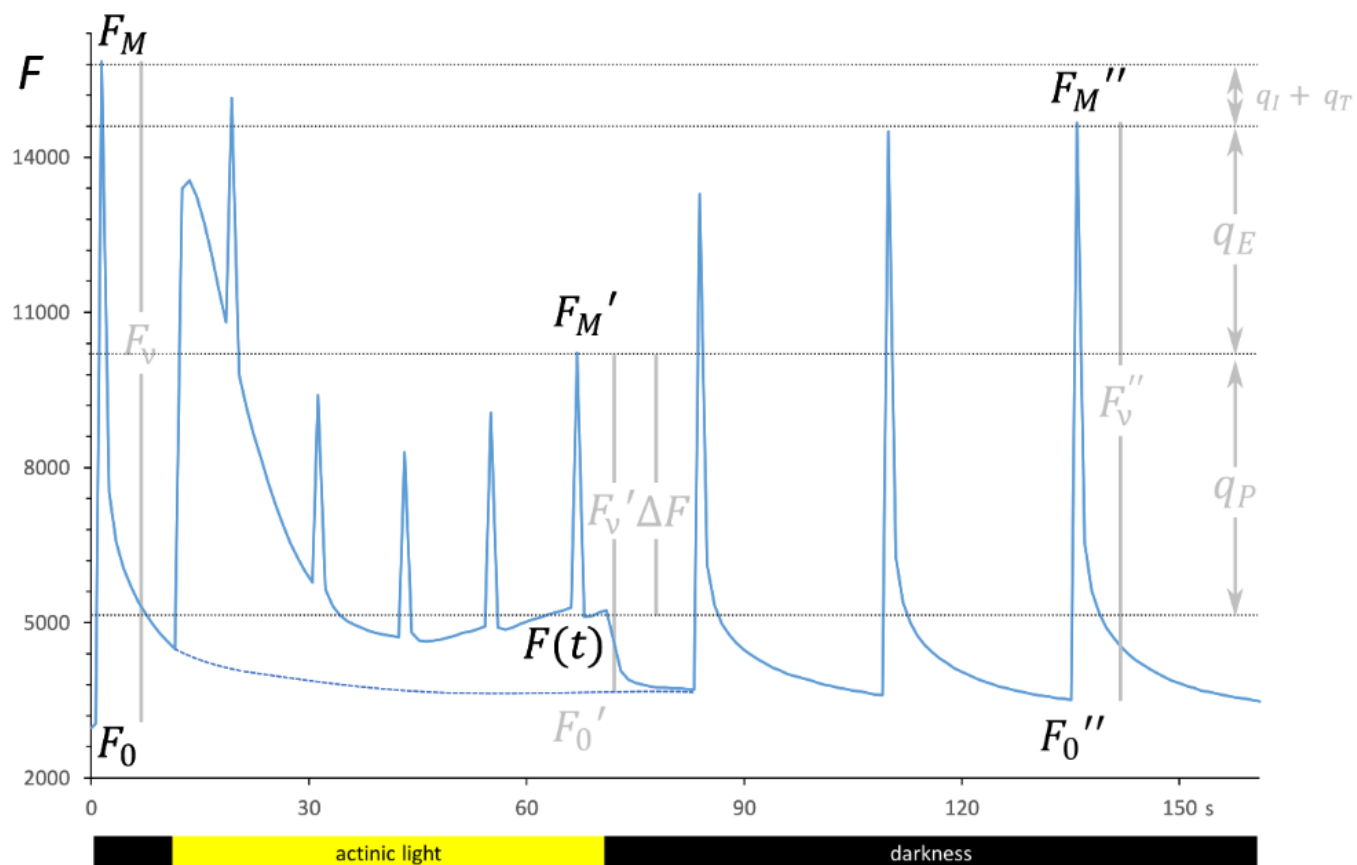

**Figure S1:** Exemplary Kautsky curve of KC experiments, indication of fluorescence parameters and coefficients, for details see Materials and Methods and Table S2.

**Table S2.** Calculation and definition of photosynthesis coefficients (Strasser and Govindjee, 1992; Strasser et al., 2004; Baker, 2008; Tsimilli-Michael and Strasser, 2013; Lazár, 2015; Rusaczonek et al., 2015)

| Quenching of induced fluorescence analysis                                          |                                                                                                              |
|-------------------------------------------------------------------------------------|--------------------------------------------------------------------------------------------------------------|
| $F_0$                                                                               | Saturation pulse, baseline fluorescence                                                                      |
| $F_0'$                                                                              | Measuring pulse baseline fluorescence during actinic light phase                                             |
| $F_0''$                                                                             | Baseline fluorescence during subsequent dark phase                                                           |
| $F_M$                                                                               | Saturation pulse, maximum fluorescence                                                                       |
| $F_M'$                                                                              | Saturation pulse, maximum fluorescence during actinic light phase                                            |
| $F_M''$                                                                             | Saturation pulse, maximum F during subsequent dark light phase                                               |
| $F(t)$                                                                              | Baseline F during actinic light phase                                                                        |
| $F_V = F_M - F_0$                                                                   | Variable F after adapted dark phase                                                                          |
| $F_V' = F_M' - F_0'$                                                                | Variable F in actinic light phase                                                                            |
| $F_V'' = F_M'' - F_0''$                                                             | Variable F in subsequent dark phase                                                                          |
| $\Delta F = F_M' - F(t)$                                                            | Difference between $F_V'$ and $F(t)$                                                                         |
| $\phi_{max} = F_V / F_M$                                                            | PSII maximum quantum yield after dark adaptation                                                             |
| $\phi_{PSII} = F_V' / F_M'$                                                         | PSII potential quantum yield                                                                                 |
| $rETR = \phi_{PSII} \times PPFD \times 0.5$                                         | Relative electron transport rate; PPFD: Photosynthetic photon flux density                                   |
| $PQ = (F_M / F(t)) - (F_M / F_M')$                                                  | Photochemical quenching                                                                                      |
| $NPQ = (F_M / F_M') / F_M'$                                                         | Non-photochemical quenching                                                                                  |
| $q_E = (F_M'' - F_V') / F_M''$                                                      | Energy-dependent non-photochemical quenching                                                                 |
| $q_I = 1 - (F_V'' / F_V)$                                                           | Photoinhibitory non-photochemical quenching coefficient                                                      |
| $q_P = \Delta F / (F_M' - F_0')$                                                    | Photochemical quenching coefficient, correlates nonlinearly to the fraction of “open” PSII centers           |
| $q_L = ((F_M' - F(t)) / (F_M' - F_0')) \times (F_0' / F(t))$                        | Photochemical quenching coefficient, correlates linearly to the fraction of “open” PSII centers (lake model) |
| OJIP transient analysis                                                             |                                                                                                              |
| $F_O (= F_0)$                                                                       | F intensity at 50 μs                                                                                         |
| $F_I$                                                                               | F intensity at J-step (at 2ms)                                                                               |
| $F_L$                                                                               | F intensity at I-step (at 30 ms)                                                                             |
| $F_P (= F_m)$                                                                       | Maximum F intensity                                                                                          |
| $F_v = F_P - F_O$                                                                   | Maximal variable F                                                                                           |
| $F_P / F_O$                                                                         | F ratio                                                                                                      |
| $Area$                                                                              | Area between fluorescence curve and $F_P$                                                                    |
| $M_0 = 4 (F_{300\mu s} - F_O) / (F_M - F_O)$                                        | Approximated initial slope of the O–J fluorescence transient (in ms <sup>-1</sup> )                          |
| $S_M = Area / (F_P - F_O)$                                                          | The normalized area below the OJIP curve until $F_P$                                                         |
| $V_I = (F_I - F_O) / (F_P - F_O)$                                                   | Relative fluorescence during the I-step                                                                      |
| $V_J = (F_J - F_O) / (F_P - F_O)$                                                   | Relative fluorescence during the J-step                                                                      |
| $N = S_M \times M_0 \times (1 / V_J)$                                               | Turn-over number of $Q_A$                                                                                    |
| $\phi_{P_0} = F_V / F_P = \phi_{max}$                                               | Maximum quantum yield of PSII                                                                                |
| $V_I = (F_I - F_O) / (F_M - F_O)$                                                   | Relative variable fluorescence at the I-step                                                                 |
| $V_J = (F_J - F_O) / (F_M - F_O)$                                                   | Relative variable fluorescence at the J-step                                                                 |
| $\psi_0 = 1 - V_J$                                                                  | Probability at t = 0 that an electron moves into the electron transport chain beyond $Q_A^-$                 |
| Specific energy fluxes                                                              |                                                                                                              |
| $ABS/RC = (M_0 / V_J) / \phi_{P_0}$                                                 | Absorption flux per reaction center (RC) (apparent antenna size of an active PSII)                           |
| $TR_0/RC = M_0 / V_J$                                                               | Trapped energy flux per RC                                                                                   |
| $ET_0/RC = (M_0 / V_J) \times \psi_0$                                               | Electron transport flux per RC                                                                               |
| $DI_0/RC = ABS/RC - TR_0/RC$                                                        | Dissipated energy flux per RC                                                                                |
| Performance index                                                                   |                                                                                                              |
| $PI_{ABS} = RC/ABS \times (\phi_{P_0} / 1 - \phi_{P_0}) \times (\psi_0/1 - \psi_0)$ | Performance index on absorption basis related to the overall photosynthetic activity of PSII                 |

**References:**

Baker, N.R. (2008). Chlorophyll fluorescence: a probe of photosynthesis in vivo. *Annu. Rev. Plant Biol.* 59, 89-113.

Lazár, D. (2015). Parameters of photosynthetic energy partitioning. *Journal of Plant Physiology* 175, 131-147.

Rusaczonek, A., Czarnocka, W., Kacprzak, S., Witoń, D., Ślesak, I., Szechyńska-Hebda, M., et al. (2015). Role of phytochromes A and B in the regulation of cell death and acclimatory responses to UV stress in *Arabidopsis thaliana*. *Journal of Experimental Botany* 66(21), 6679-6695.

Strasser, R.J., and Govindjee (1992). "The Fo and the OJIP Fluorescence Rise in Higher Plants and Algae," in *Regulation of Chloroplast Biogenesis*, ed. J.H. Argyroudi-Akoyunoglou. (Boston, MA: Springer US), 423-426.

Strasser, R.J., Tsimilli-Michael, M., and Srivastava, A. (2004). "Analysis of the chlorophyll a fluorescence transient," in *Chlorophyll a fluorescence*. Springer), 321-362.

**Table S3.** Summary statistics and 95% Tukey multiple range test of  $\phi_{PSII}$  and  $\phi_{MAX}$  among cytotypes exposed to different photoperiods (SE, standard error; CL, 95% confidential limits).

| Parameter     | Cytotype | Photoperiod (h) | Mean  | SE    | <i>n</i> | Lower CL | upper CL | Group     |
|---------------|----------|-----------------|-------|-------|----------|----------|----------|-----------|
| $\phi_{PSII}$ | 2x       | 10.0            | 0.720 | 0.006 | 665      | 0.707    | 0.731    | <i>b</i>  |
|               | 2x       | 16.5            | 0.710 | 0.006 | 665      | 0.698    | 0.722    | <i>b</i>  |
|               | 4x       | 10.0            | 0.707 | 0.006 | 665      | 0.694    | 0.719    | <i>b</i>  |
|               | 4x       | 16.5            | 0.697 | 0.006 | 665      | 0.685    | 0.709    | <i>ab</i> |
|               | 6x_29    | 10.0            | 0.720 | 0.010 | 665      | 0.699    | 0.739    | <i>b</i>  |
|               | 6x_29    | 16.5            | 0.722 | 0.012 | 665      | 0.698    | 0.745    | <i>b</i>  |
|               | 6x_35    | 10.0            | 0.617 | 0.010 | 665      | 0.597    | 0.636    | <i>a</i>  |
|               | 6x_35    | 16.5            | 0.676 | 0.009 | 665      | 0.659    | 0.693    | <i>a</i>  |
| $\phi_{MAX}$  | 2x       | 10.0            | 0.821 | 0.008 | 170      | 0.804    | 0.837    | <i>b</i>  |
|               | 2x       | 16.5            | 0.815 | 0.009 | 170      | 0.797    | 0.832    | <i>b</i>  |
|               | 4x       | 10.0            | 0.823 | 0.009 | 170      | 0.805    | 0.839    | <i>b</i>  |
|               | 4x       | 16.5            | 0.818 | 0.008 | 170      | 0.802    | 0.833    | <i>b</i>  |
|               | 6x_29    | 10.0            | 0.826 | 0.012 | 170      | 0.800    | 0.849    | <i>b</i>  |
|               | 6x_29    | 16.5            | 0.808 | 0.017 | 170      | 0.774    | 0.839    | <i>b</i>  |
|               | 6x_35    | 10.0            | 0.705 | 0.015 | 170      | 0.674    | 0.735    | <i>a</i>  |
|               | 6x_35    | 16.5            | 0.671 | 0.014 | 170      | 0.643    | 0.697    | <i>a</i>  |

**Table S4.** Summary statistic and 95% Duncan multiple range test of coefficients from transient fluorescence analyses (OJIP) of cytotypes that were exposed to two photoperiods (SD, standard deviation).

| Coeff.                   | Cytotype | Photoper. (h) | Mean  | SD    | <i>n</i> | Min   | Max   | Group     |
|--------------------------|----------|---------------|-------|-------|----------|-------|-------|-----------|
| <i>ABS/RC</i>            | 2x       | 10.0          | 1.902 | 0.181 | 10       | 1.662 | 2.264 | <i>c</i>  |
|                          | 2x       | 16.5          | 2.090 | 0.154 | 10       | 1.926 | 2.400 | <i>bc</i> |
|                          | 4x       | 10.0          | 1.987 | 0.162 | 10       | 1.827 | 2.376 | <i>c</i>  |
|                          | 4x       | 16.5          | 1.885 | 0.290 | 11       | 1.383 | 2.380 | <i>c</i>  |
|                          | 6x_29    | 10.0          | 2.017 | 0.099 | 4        | 1.869 | 2.083 | <i>c</i>  |
|                          | 6x_29    | 16.5          | 1.931 | 0.295 | 3        | 1.596 | 2.154 | <i>c</i>  |
|                          | 6x_35    | 10.0          | 2.714 | 0.756 | 7        | 2.000 | 4.000 | <i>b</i>  |
|                          | 6x_35    | 16.5          | 3.866 | 1.399 | 7        | 2.000 | 5.870 | <i>a</i>  |
| <i>DI<sub>0</sub>/RC</i> | 2x       | 10.0          | 0.336 | 0.052 | 10       | 0.268 | 0.412 | <i>c</i>  |
|                          | 2x       | 16.5          | 0.403 | 0.054 | 10       | 0.350 | 0.498 | <i>c</i>  |
|                          | 4x       | 10.0          | 0.357 | 0.045 | 10       | 0.313 | 0.460 | <i>c</i>  |
|                          | 4x       | 16.5          | 0.354 | 0.087 | 11       | 0.224 | 0.485 | <i>c</i>  |
|                          | 6x_29    | 10.0          | 0.357 | 0.028 | 4        | 0.319 | 0.384 | <i>c</i>  |
|                          | 6x_29    | 16.5          | 0.350 | 0.078 | 3        | 0.260 | 0.395 | <i>c</i>  |
|                          | 6x_35    | 10.0          | 0.867 | 0.551 | 7        | 0.348 | 2.000 | <i>b</i>  |
|                          | 6x_35    | 16.5          | 1.545 | 0.905 | 7        | 0.504 | 2.974 | <i>a</i>  |
| <i>TR<sub>0</sub>/RC</i> | 2x       | 10.0          | 1.566 | 0.134 | 10       | 1.393 | 1.853 | <i>c</i>  |
|                          | 2x       | 16.5          | 1.688 | 0.102 | 10       | 1.576 | 1.902 | <i>c</i>  |
|                          | 4x       | 10.0          | 1.631 | 0.120 | 10       | 1.507 | 1.917 | <i>c</i>  |
|                          | 4x       | 16.5          | 1.572 | 0.251 | 11       | 1.159 | 2.000 | <i>c</i>  |
|                          | 6x_29    | 10.0          | 1.659 | 0.073 | 4        | 1.550 | 1.699 | <i>c</i>  |
|                          | 6x_29    | 16.5          | 1.582 | 0.219 | 3        | 1.337 | 1.759 | <i>c</i>  |
|                          | 6x_35    | 10.0          | 2.000 | 0.000 | 7        | 2.000 | 2.000 | <i>b</i>  |
|                          | 6x_35    | 16.5          | 2.393 | 0.434 | 7        | 2.000 | 2.985 | <i>a</i>  |
| <i>ET<sub>0</sub>/RC</i> | 2x       | 10.0          | 0.964 | 0.067 | 10       | 0.866 | 1.097 | <i>b</i>  |
|                          | 2x       | 16.5          | 0.993 | 0.047 | 10       | 0.917 | 1.072 | <i>b</i>  |
|                          | 4x       | 10.0          | 0.981 | 0.057 | 10       | 0.887 | 1.047 | <i>b</i>  |
|                          | 4x       | 16.5          | 0.886 | 0.081 | 11       | 0.699 | 0.985 | <i>b</i>  |
|                          | 6x_29    | 10.0          | 0.965 | 0.071 | 4        | 0.910 | 1.067 | <i>b</i>  |
|                          | 6x_29    | 16.5          | 0.952 | 0.079 | 3        | 0.862 | 1.011 | <i>b</i>  |
|                          | 6x_35    | 10.0          | 0.987 | 0.023 | 7        | 0.942 | 1.000 | <i>b</i>  |
|                          | 6x_35    | 16.5          | 1.301 | 0.331 | 7        | 0.949 | 1.794 | <i>a</i>  |
| <i>PI<sub>ABS</sub></i>  | 2x       | 10.0          | 4.121 | 1.014 | 10       | 2.666 | 5.928 | <i>a</i>  |
|                          | 2x       | 16.5          | 3.005 | 0.786 | 10       | 1.986 | 3.997 | <i>a</i>  |
|                          | 4x       | 10.0          | 3.696 | 1.044 | 10       | 2.073 | 4.965 | <i>a</i>  |
|                          | 4x       | 16.5          | 3.990 | 2.502 | 11       | 1.000 | 9.670 | <i>a</i>  |
|                          | 6x_29    | 10.0          | 3.267 | 0.650 | 4        | 2.547 | 3.919 | <i>a</i>  |
|                          | 6x_29    | 16.5          | 3.909 | 1.715 | 3        | 2.622 | 5.856 | <i>a</i>  |
|                          | 6x_35    | 10.0          | 1.410 | 0.949 | 7        | 0.325 | 3.000 | <i>b</i>  |
|                          | 6x_35    | 16.5          | 0.787 | 0.645 | 7        | 0.224 | 2.000 | <i>b</i>  |

**Table S5.** Summary statistics and 95% Duncan multiple range test of relative electron transport rates (*rETR*) among cytotypes that were exposed to different photoperiods in increasing PPFD intensities (SD, standard deviation).

| PPFD<br>( $\mu\text{mol m}^{-2} \text{ sec}^{-1}$ ) | Cytotype | Photoperiod (h) | Mean    | SD     | <i>n</i> | Min     | Max     | Group      |
|-----------------------------------------------------|----------|-----------------|---------|--------|----------|---------|---------|------------|
| 10                                                  | 2x       | 10.0            | 5.200   | 0.499  | 10       | 4.200   | 5.900   | <i>bc</i>  |
|                                                     | 2x       | 16.5            | 5.720   | 0.361  | 10       | 5.300   | 6.400   | <i>a</i>   |
|                                                     | 4x       | 10.0            | 4.860   | 0.556  | 10       | 4.000   | 5.700   | <i>cd</i>  |
|                                                     | 4x       | 16.5            | 5.578   | 0.331  | 9        | 5.200   | 6.100   | <i>ab</i>  |
|                                                     | 6x_29    | 10.0            | 5.160   | 0.288  | 5        | 4.900   | 5.600   | <i>bc</i>  |
|                                                     | 6x_29    | 16.5            | 5.167   | 0.306  | 3        | 4.900   | 5.500   | <i>bc</i>  |
|                                                     | 6x_35    | 10.0            | 4.500   | 0.339  | 5        | 4.100   | 4.900   | <i>d</i>   |
|                                                     | 6x_35    | 16.5            | 4.460   | 0.416  | 5        | 4.000   | 4.900   | <i>d</i>   |
| 20                                                  | 2x       | 10.0            | 10.860  | 1.108  | 10       | 9.000   | 12.800  | <i>ab</i>  |
|                                                     | 2x       | 16.5            | 11.640  | 0.595  | 10       | 10.800  | 12.800  | <i>a</i>   |
|                                                     | 4x       | 10.0            | 10.440  | 0.947  | 10       | 9.000   | 12.200  | <i>b</i>   |
|                                                     | 4x       | 16.5            | 11.622  | 0.484  | 9        | 10.800  | 12.400  | <i>a</i>   |
|                                                     | 6x_29    | 10.0            | 10.720  | 0.502  | 5        | 10.400  | 11.600  | <i>ab</i>  |
|                                                     | 6x_29    | 16.5            | 10.800  | 0.346  | 3        | 10.400  | 11.000  | <i>ab</i>  |
|                                                     | 6x_35    | 10.0            | 9.040   | 0.669  | 5        | 8.400   | 10.000  | <i>c</i>   |
|                                                     | 6x_35    | 16.5            | 9.120   | 0.944  | 5        | 8.000   | 10.200  | <i>c</i>   |
| 50                                                  | 2x       | 10.0            | 27.950  | 2.852  | 10       | 22.500  | 32.000  | <i>ab</i>  |
|                                                     | 2x       | 16.5            | 29.500  | 1.683  | 10       | 27.000  | 32.500  | <i>a</i>   |
|                                                     | 4x       | 10.0            | 26.600  | 2.492  | 10       | 23.000  | 31.000  | <i>b</i>   |
|                                                     | 4x       | 16.5            | 29.000  | 1.031  | 9        | 27.500  | 31.000  | <i>ab</i>  |
|                                                     | 6x_29    | 10.0            | 27.000  | 1.225  | 5        | 26.000  | 29.000  | <i>ab</i>  |
|                                                     | 6x_29    | 16.5            | 27.833  | 0.764  | 3        | 27.000  | 28.500  | <i>ab</i>  |
|                                                     | 6x_35    | 10.0            | 22.300  | 1.789  | 5        | 20.500  | 25.000  | <i>c</i>   |
|                                                     | 6x_35    | 16.5            | 23.000  | 2.739  | 5        | 19.500  | 26.000  | <i>c</i>   |
| 100                                                 | 2x       | 10.0            | 49.500  | 6.786  | 10       | 36.000  | 58.000  | <i>a</i>   |
|                                                     | 2x       | 16.5            | 52.000  | 4.422  | 10       | 44.000  | 59.000  | <i>a</i>   |
|                                                     | 4x       | 10.0            | 47.000  | 5.121  | 10       | 39.000  | 55.000  | <i>a</i>   |
|                                                     | 4x       | 16.5            | 51.000  | 2.550  | 9        | 47.000  | 55.000  | <i>a</i>   |
|                                                     | 6x_29    | 10.0            | 47.600  | 1.673  | 5        | 45.000  | 49.000  | <i>a</i>   |
|                                                     | 6x_29    | 16.5            | 49.333  | 1.528  | 3        | 48.000  | 51.000  | <i>a</i>   |
|                                                     | 6x_35    | 10.0            | 39.200  | 2.683  | 5        | 37.000  | 43.000  | <i>b</i>   |
|                                                     | 6x_35    | 16.5            | 41.000  | 5.339  | 5        | 35.000  | 47.000  | <i>b</i>   |
| 300                                                 | 2x       | 10.0            | 88.800  | 21.872 | 10       | 51.000  | 117.000 | <i>ab</i>  |
|                                                     | 2x       | 16.5            | 90.900  | 13.932 | 10       | 57.000  | 102.000 | <i>ab</i>  |
|                                                     | 4x       | 10.0            | 67.500  | 9.618  | 10       | 51.000  | 81.000  | <i>c</i>   |
|                                                     | 4x       | 16.5            | 75.000  | 13.332 | 9        | 54.000  | 90.000  | <i>bc</i>  |
|                                                     | 6x_29    | 10.0            | 88.800  | 9.149  | 5        | 78.000  | 99.000  | <i>ab</i>  |
|                                                     | 6x_29    | 16.5            | 94.000  | 1.732  | 3        | 93.000  | 96.000  | <i>abc</i> |
|                                                     | 6x_35    | 10.0            | 70.200  | 6.573  | 5        | 60.000  | 78.000  | <i>c</i>   |
|                                                     | 6x_35    | 16.5            | 76.200  | 11.345 | 5        | 63.000  | 87.000  | <i>a</i>   |
| 500                                                 | 2x       | 10.0            | 106.000 | 30.074 | 10       | 60.000  | 145.000 | <i>ab</i>  |
|                                                     | 2x       | 16.5            | 103.500 | 18.265 | 10       | 60.000  | 120.000 | <i>ab</i>  |
|                                                     | 4x       | 10.0            | 71.000  | 11.972 | 10       | 50.000  | 90.000  | <i>d</i>   |
|                                                     | 4x       | 16.5            | 78.889  | 17.989 | 9        | 50.000  | 100.000 | <i>cd</i>  |
|                                                     | 6x_29    | 10.0            | 113.000 | 12.550 | 5        | 100.000 | 125.000 | <i>ab</i>  |
|                                                     | 6x_29    | 16.5            | 116.667 | 2.887  | 3        | 115.000 | 120.000 | <i>a</i>   |
|                                                     | 6x_35    | 10.0            | 91.000  | 7.416  | 5        | 80.000  | 100.000 | <i>bcd</i> |
|                                                     | 6x_35    | 16.5            | 98.000  | 13.038 | 5        | 80.000  | 110.000 | <i>abc</i> |

**Table S6.** Summary statistic and 95% Duncan multiple range test of coefficients calculated from Kautsky curve experiments for different cytotypes that were exposed to two photoperiods (SD, standard deviation).

| Coeff.               | Cytotype | Photoper. (h) | Mean  | SD    | <i>n</i> | Min   | Max   | Group      |
|----------------------|----------|---------------|-------|-------|----------|-------|-------|------------|
| <i>NPQ</i>           | 2x       | 10.0          | 0.654 | 0.213 | 10       | 0.334 | 0.951 | <i>cd</i>  |
|                      | 2x       | 16.5          | 0.990 | 0.347 | 10       | 0.606 | 1.729 | <i>abc</i> |
|                      | 4x       | 10.0          | 1.102 | 0.390 | 10       | 0.290 | 1.782 | <i>ab</i>  |
|                      | 4x       | 16.5          | 1.241 | 0.376 | 10       | 0.886 | 2.007 | <i>a</i>   |
|                      | 6x_29    | 10.0          | 0.451 | 0.088 | 4        | 0.342 | 0.549 | <i>d</i>   |
|                      | 6x_29    | 16.5          | 0.753 | 0.173 | 3        | 0.641 | 0.952 | <i>bcd</i> |
|                      | 6x_35    | 10.0          | 1.164 | 0.451 | 4        | 0.631 | 1.699 | <i>ab</i>  |
|                      | 6x_35    | 16.5          | 1.237 | 0.381 | 9        | 0.716 | 1.897 | <i>a</i>   |
| <i>q<sub>E</sub></i> | 2x       | 10.0          | 0.450 | 0.178 | 10       | 0.161 | 0.762 | <i>bc</i>  |
|                      | 2x       | 16.5          | 0.728 | 0.289 | 10       | 0.412 | 1.361 | <i>ab</i>  |
|                      | 4x       | 10.0          | 0.698 | 0.244 | 10       | 0.171 | 1.054 | <i>ab</i>  |
|                      | 4x       | 16.5          | 0.869 | 0.269 | 10       | 0.483 | 1.415 | <i>a</i>   |
|                      | 6x_29    | 10.0          | 0.350 | 0.108 | 4        | 0.218 | 0.480 | <i>c</i>   |
|                      | 6x_29    | 16.5          | 0.605 | 0.149 | 3        | 0.503 | 0.776 | <i>abc</i> |
|                      | 6x_35    | 10.0          | 0.801 | 0.225 | 4        | 0.511 | 1.045 | <i>a</i>   |
|                      | 6x_35    | 16.5          | 0.889 | 0.180 | 9        | 0.582 | 1.119 | <i>a</i>   |
| <i>q<sub>I</sub></i> | 2x       | 10.0          | 0.172 | 0.057 | 10       | 0.118 | 0.304 | <i>ab</i>  |
|                      | 2x       | 16.5          | 0.178 | 0.057 | 10       | 0.111 | 0.312 | <i>ab</i>  |
|                      | 4x       | 10.0          | 0.263 | 0.060 | 10       | 0.155 | 0.350 | <i>a</i>   |
|                      | 4x       | 16.5          | 0.229 | 0.052 | 10       | 0.136 | 0.306 | <i>a</i>   |
|                      | 6x_29    | 10.0          | 0.120 | 0.015 | 4        | 0.105 | 0.139 | <i>b</i>   |
|                      | 6x_29    | 16.5          | 0.131 | 0.005 | 3        | 0.126 | 0.134 | <i>b</i>   |
|                      | 6x_35    | 10.0          | 0.258 | 0.171 | 4        | 0.120 | 0.506 | <i>a</i>   |
|                      | 6x_35    | 16.5          | 0.256 | 0.085 | 9        | 0.132 | 0.363 | <i>a</i>   |
| <i>PQ</i>            | 2x       | 10.0          | 1.263 | 0.238 | 10       | 1.008 | 1.753 | <i>abc</i> |
|                      | 2x       | 16.5          | 1.425 | 0.276 | 10       | 0.808 | 1.700 | <i>a</i>   |
|                      | 4x       | 10.0          | 1.093 | 0.296 | 10       | 0.507 | 1.458 | <i>bcd</i> |
|                      | 4x       | 16.5          | 1.358 | 0.218 | 10       | 0.897 | 1.639 | <i>ab</i>  |
|                      | 6x_29    | 10.0          | 0.789 | 0.248 | 4        | 0.447 | 0.980 | <i>e</i>   |
|                      | 6x_29    | 16.5          | 1.004 | 0.147 | 3        | 0.905 | 1.173 | <i>cde</i> |
|                      | 6x_35    | 10.0          | 0.856 | 0.214 | 4        | 0.580 | 1.032 | <i>de</i>  |
|                      | 6x_35    | 16.5          | 0.869 | 0.111 | 9        | 0.688 | 1.008 | <i>de</i>  |
| <i>q<sub>P</sub></i> | 2x       | 10.0          | 0.601 | 0.065 | 10       | 0.528 | 0.708 | <i>a</i>   |
|                      | 2x       | 16.5          | 0.600 | 0.050 | 10       | 0.483 | 0.656 | <i>a</i>   |
|                      | 4x       | 10.0          | 0.486 | 0.075 | 10       | 0.352 | 0.580 | <i>bc</i>  |
|                      | 4x       | 16.5          | 0.569 | 0.049 | 10       | 0.465 | 0.618 | <i>ab</i>  |
|                      | 6x_29    | 10.0          | 0.447 | 0.095 | 4        | 0.312 | 0.518 | <i>c</i>   |
|                      | 6x_29    | 16.5          | 0.509 | 0.023 | 3        | 0.488 | 0.535 | <i>abc</i> |
|                      | 6x_35    | 10.0          | 0.569 | 0.149 | 4        | 0.358 | 0.706 | <i>ab</i>  |
|                      | 6x_35    | 16.5          | 0.573 | 0.069 | 9        | 0.414 | 0.638 | <i>ab</i>  |
| <i>q<sub>L</sub></i> | 2x       | 10.0          | 0.299 | 0.097 | 10       | 0.198 | 0.523 | <i>ab</i>  |
|                      | 2x       | 16.5          | 0.317 | 0.057 | 10       | 0.224 | 0.404 | <i>ab</i>  |
|                      | 4x       | 10.0          | 0.226 | 0.069 | 10       | 0.097 | 0.335 | <i>bc</i>  |
|                      | 4x       | 16.5          | 0.306 | 0.059 | 10       | 0.222 | 0.438 | <i>ab</i>  |
|                      | 6x_29    | 10.0          | 0.160 | 0.057 | 4        | 0.083 | 0.207 | <i>c</i>   |
|                      | 6x_29    | 16.5          | 0.230 | 0.023 | 3        | 0.211 | 0.255 | <i>bc</i>  |
|                      | 6x_35    | 10.0          | 0.397 | 0.202 | 4        | 0.129 | 0.619 | <i>a</i>   |
|                      | 6x_35    | 16.5          | 0.402 | 0.101 | 9        | 0.220 | 0.489 | <i>a</i>   |
